# Supplementary material
Source: Springer Nature journal article supplement (https://www.springermedizin.de/resource/supplementary/12875_2013_1031_MOESM2_ESM.pdf/9436014)
Supplement: MOESM2 [file 9436014]

### Participants

- Identify a target population (e.g 40-65 yo)
- Invite to attend a visit with the Prevention Practitioner

### Preliminary Assessment

- Participants complete a health survey before the visit
- Participants' surveys and medical histories are reviewed and eligible CDPS maneuvers are identified

### Prevention Practitioner Visit

- Through shared decision making and motivational interviewing a personalized prevention prescription tailored to the patient is developed and the patient is provided with a copy
- A follow-up visit time frame is identified
- The participant may be linked to community/local resources (e.g. to help with smoking cessation)

### Follow-up

- Reasses participant on follow-up
- Participant completes a health survey at 6 and 12 months after the initial visit
